# Supplementary material
Source: PubMed Central journal article supplement (PMC4456684)
Supplement: NIHMS602925-supplement-01.pdf [file NIHMS602925-supplement-01.pdf]

| DRM       | Formula                                                            | Exact Mass<br>[M+H] <sup>+</sup> | Distribution |
|-----------|--------------------------------------------------------------------|----------------------------------|--------------|
| Lapatinib | C <sub>29</sub> H <sub>26</sub> ClFN <sub>4</sub> O <sub>4</sub> S | 581.1420                         |              |
| M1        | C <sub>22</sub> H <sub>21</sub> ClN <sub>4</sub> O <sub>4</sub> S  | 473.1045                         |              |
| M2        | C <sub>26</sub> H <sub>18</sub> ClFN <sub>4</sub> O <sub>2</sub>   | 473.1175                         |              |
| M4        | C <sub>26</sub> H <sub>20</sub> ClFN <sub>4</sub> O <sub>2</sub>   | 475.1332                         |              |
| M8        | C <sub>29</sub> H <sub>26</sub> ClFN <sub>4</sub> O <sub>5</sub> S | 597.1369                         |              |
| M9/10     | C <sub>26</sub> H <sub>18</sub> ClFN <sub>4</sub> O <sub>3</sub>   | 489.1124                         |              |
| M11       | C <sub>26</sub> H <sub>17</sub> ClFN <sub>3</sub> O <sub>3</sub>   | 474.1015                         |              |
| M12       | C <sub>26</sub> H <sub>17</sub> ClFN <sub>3</sub> O <sub>4</sub>   | 490.0964                         |              |
|           | C <sub>26</sub> H <sub>17</sub> ClFN <sub>3</sub> O <sub>2</sub>   | 458.1066                         |              |
|           | C <sub>26</sub> H <sub>19</sub> ClFN <sub>3</sub> O <sub>2</sub>   | 460.1223                         |              |
|           | C <sub>22</sub> H <sub>19</sub> ClN <sub>4</sub> O <sub>4</sub> S  | 471.0888                         |              |
|           | C <sub>27</sub> H <sub>20</sub> ClFN <sub>4</sub> O <sub>3</sub>   | 503.1281                         |              |

**Supplemental Fig. S1** Ion maps for all drug related material (lapatinib and metabolites) that were observed from the preliminary IR-MALDESI MSI analysis

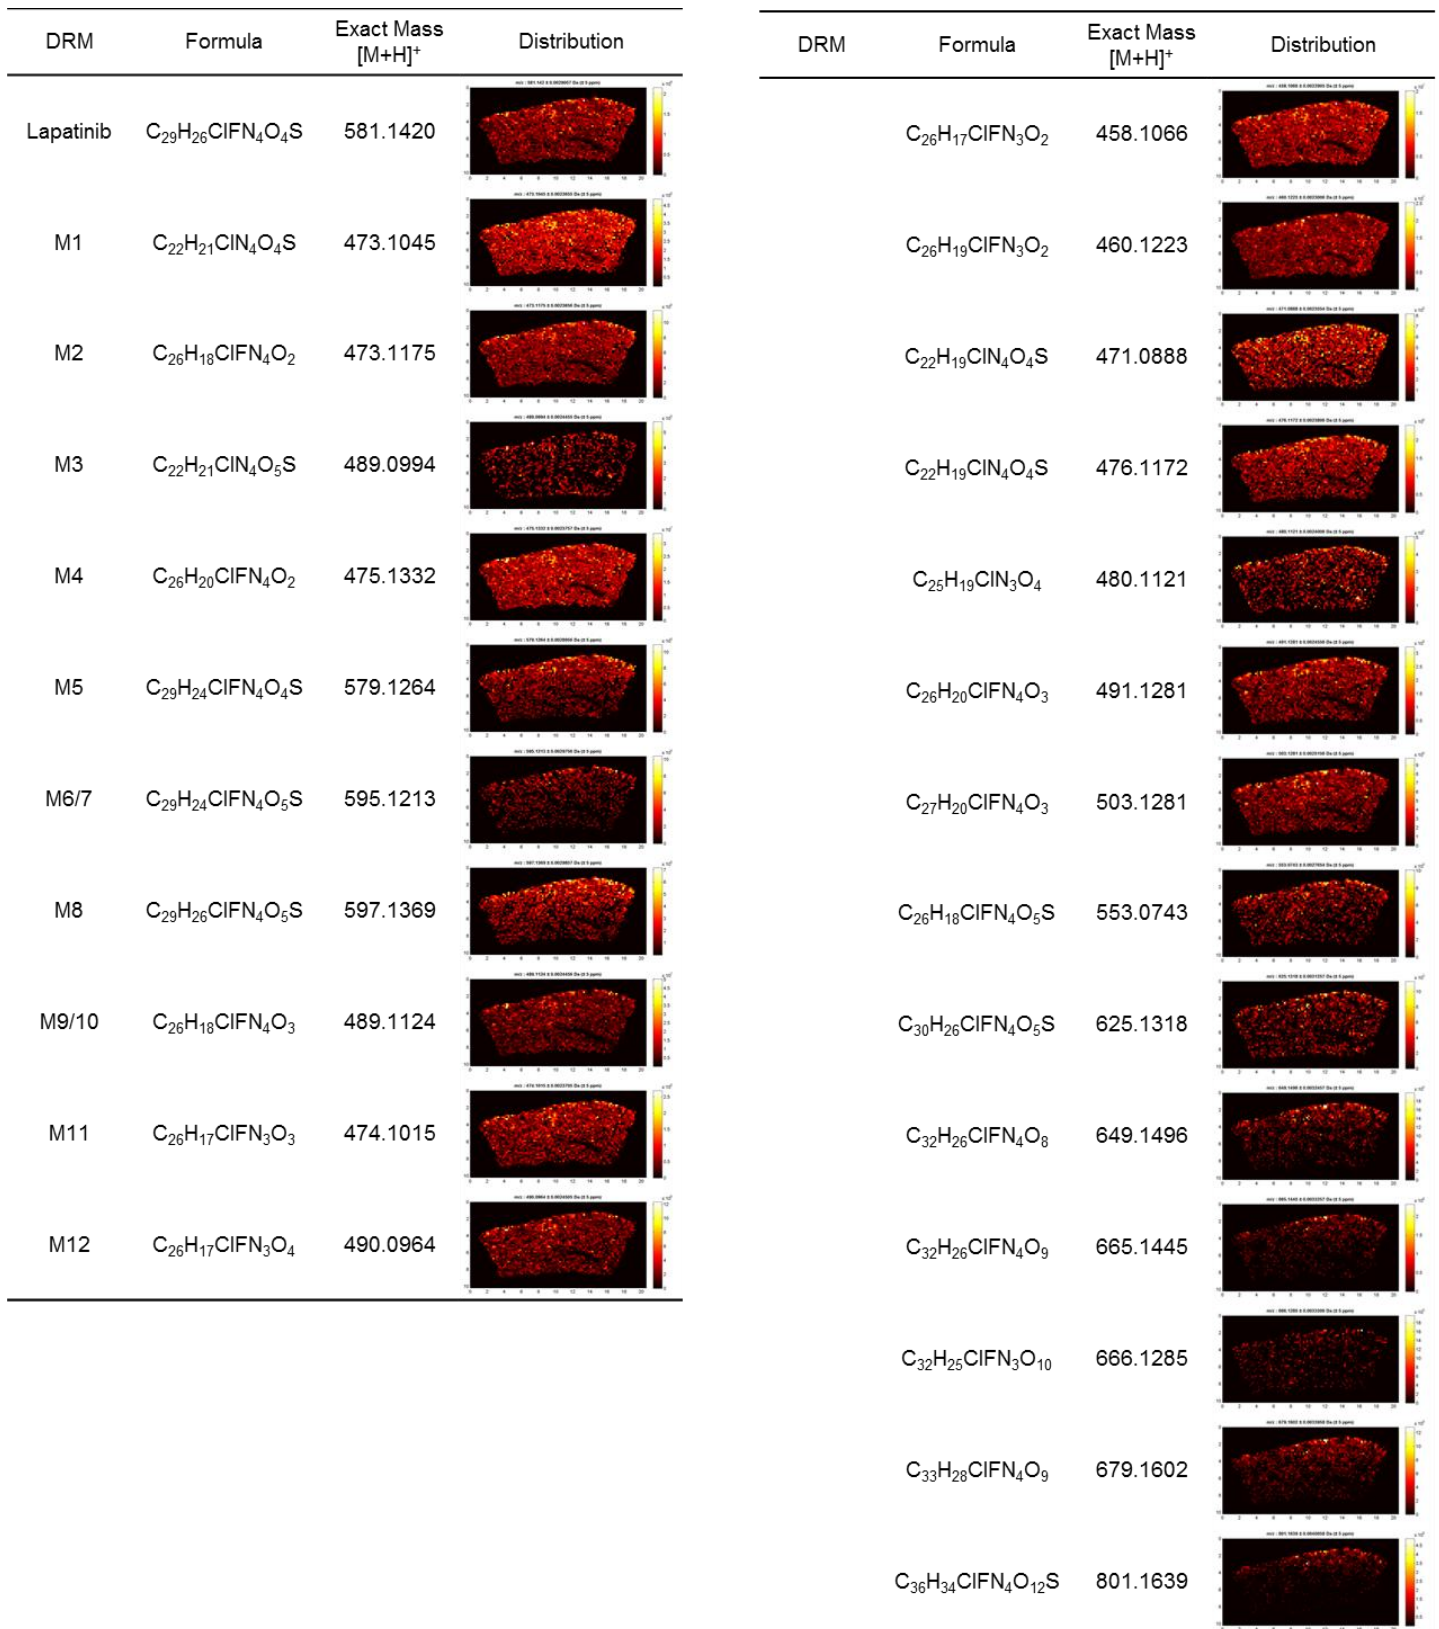

**Supplemental Fig. S2** Ion maps for all drug related material (lapatinib and metabolites) that were observed from the UV-MALDI MSI analysis

| DRM       | Formula                                                            | Exact Mass<br>[M+H] <sup>+</sup> | Distribution                                                                        |
|-----------|--------------------------------------------------------------------|----------------------------------|-------------------------------------------------------------------------------------|
| Lapatinib | C <sub>29</sub> H <sub>26</sub> ClFN <sub>4</sub> O <sub>4</sub> S | 581.1420                         | 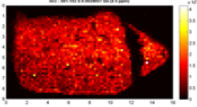   |
| M1        | C <sub>22</sub> H <sub>21</sub> ClN <sub>4</sub> O <sub>4</sub> S  | 473.1045                         |    |
| M2        | C <sub>26</sub> H <sub>18</sub> ClFN <sub>4</sub> O <sub>2</sub>   | 473.1175                         |    |
| M3        | C <sub>22</sub> H <sub>21</sub> ClN <sub>4</sub> O <sub>5</sub> S  | 489.0994                         |    |
| M4        | C <sub>26</sub> H <sub>20</sub> ClFN <sub>4</sub> O <sub>2</sub>   | 475.1332                         |    |
| M8        | C <sub>29</sub> H <sub>26</sub> ClFN <sub>4</sub> O <sub>5</sub> S | 597.1369                         |    |
| M9/10     | C <sub>26</sub> H <sub>18</sub> ClFN <sub>4</sub> O <sub>3</sub>   | 489.1124                         |    |
| M11       | C <sub>26</sub> H <sub>17</sub> ClFN <sub>3</sub> O <sub>3</sub>   | 474.1015                         |  |
| M12       | C <sub>26</sub> H <sub>17</sub> ClFN <sub>3</sub> O <sub>4</sub>   | 490.0964                         |  |

| DRM | Formula                                                             | Exact Mass<br>[M+H] <sup>+</sup> | Distribution                                                                        |
|-----|---------------------------------------------------------------------|----------------------------------|-------------------------------------------------------------------------------------|
|     | C <sub>26</sub> H <sub>17</sub> ClFN <sub>3</sub> O <sub>2</sub>    | 458.1066                         | 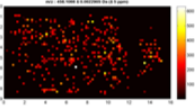 |
|     | C <sub>22</sub> H <sub>19</sub> ClN <sub>4</sub> O <sub>4</sub> S   | 476.1172                         |  |
|     | C <sub>27</sub> H <sub>20</sub> ClFN <sub>4</sub> O <sub>3</sub>    | 503.1281                         |  |
|     | C <sub>30</sub> H <sub>26</sub> ClFN <sub>4</sub> O <sub>5</sub> S  | 625.1318                         |  |
|     | C <sub>35</sub> H <sub>34</sub> ClFN <sub>4</sub> O <sub>11</sub> S | 773.1690                         |  |
|     | C <sub>36</sub> H <sub>34</sub> ClFN <sub>4</sub> O <sub>12</sub> S | 801.1639                         |  |

**Supplemental Fig. S3** Ion maps for all drug related material (lapatinib and metabolites) that were observed from the optimized IR-MALDESI MSI analysis
